# Supplementary material for: Changing patterns of fire occurrence in proximity to forest edges, roads and rivers between NW Amazonian countries
Source: Copernicus journal article supplement (doi:10.5194/bg-2016-532), 2017-01-12
Supplement: Supplementary file 1 [file bg-2016-532-supplement.pdf]

**Supplementary Information 1.** Results of the test Anderson country pair comparisons of their respective curves of distances of fire occurrences to roads and rivers in each country.

| Country  | Colombia |         | Ecuador |         | Peru    |         | Venezuela |
|----------|----------|---------|---------|---------|---------|---------|-----------|
|          | roads    | rivers  | roads   | rivers  | roads   | rivers  | rivers    |
| Brazil   | p <0.01  | p <0.01 | p <0.01 | p <0.01 | p <0.01 | p <0.01 | p <0.01   |
| Colombia |          |         | p <0.01   |
| Ecuador  |          |         |         |         | p <0.01 | p <0.01 | p <0.01   |
| Peru     |          |         |         |         |         |         | p <0.01   |

**Supplementary Information 2.** Results of the test Anderson country pair comparisons of their respective null model curves of distances of fire occurrences to forest edge (outside or inside the forest) in each country.

| Country  | Colombia |         | Ecuador |         | Peru    |         | Venezuela |         |
|----------|----------|---------|---------|---------|---------|---------|-----------|---------|
|          | outside  | inside  | outside | inside  | outside | inside  | outside   | inside  |
| Brazil   | p <0.01  | p <0.01 | p <0.01 | p <0.01 | p <0.01 | p <0.01 | p <0.01   | p <0.01 |
| Colombia |          |         | p <0.01   | p <0.01 |
| Ecuador  |          |         |         |         | p <0.01 | p <0.01 | p <0.01   | p <0.01 |
| Peru     |          |         |         |         |         |         | p <0.01   | p <0.01 |
