# Supplementary material for: Changing patterns of fire occurrence in proximity to forest edges, roads and rivers between NW Amazonian countries
Source: Copernicus journal article supplement (doi:10.5194/bg-2016-532), 2017-01-12

Results shown in Figs 4 and 5 are the centerpieces of this study, in my opinion (The first part of this study, i.e., the regional differences in fire occurrences, is quite obvious and well studied before). So I suggest the authors should put more efforts in the discussion of these results. For instance, are these relationships changing in different years, or at different stages of the fire season? Other than the cumulative frequency (CDF), I would also like to see the observed fire density patterns as a function to the distance to rivers/roads/forest edges.

Thank you for your interesting suggestion. The yearly analysis although extremely interesting will need to consider other variables affecting fires such as climate and also the ignition variability and types of fires that were out of the scope of this particular paper but we hope further research will add more knowledge into.

Here we present some further histograms but we believe this is a bit repetitive to be included in the document:

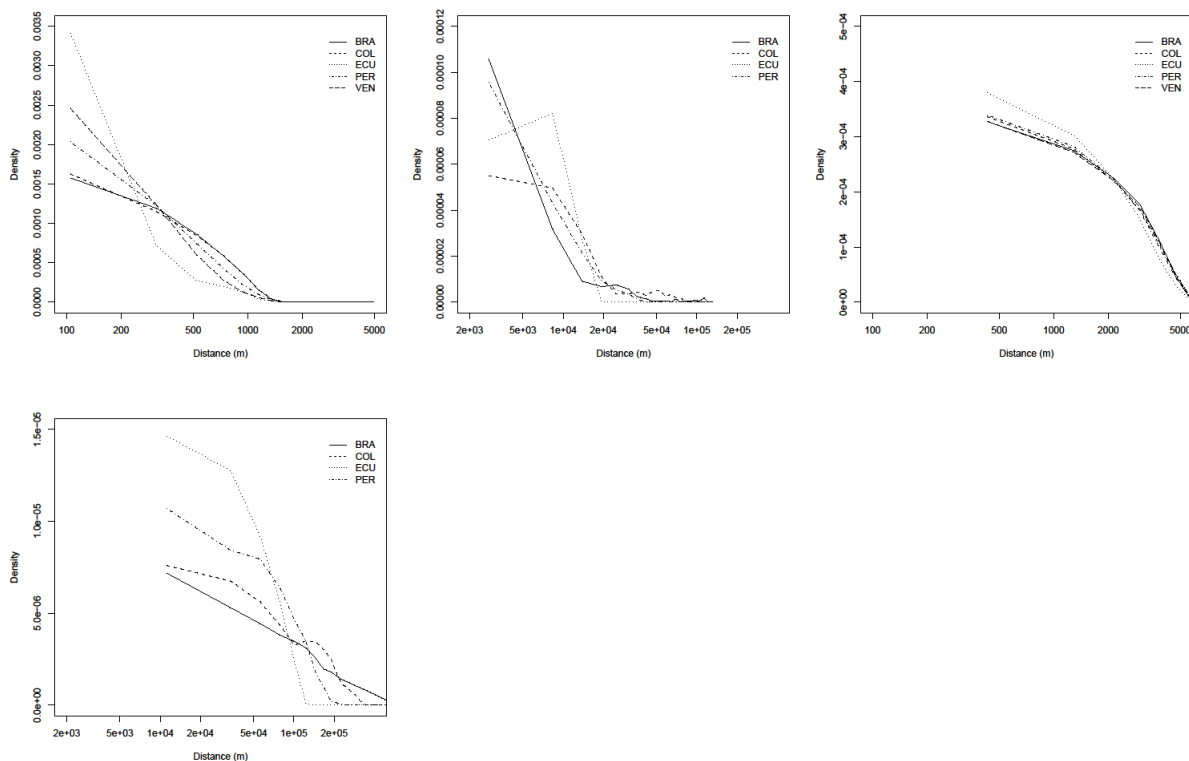

P14 - Is it possible to show major roads and rivers in this figure?

The Figure will get really dense; we will incorporate this new Figure 1.

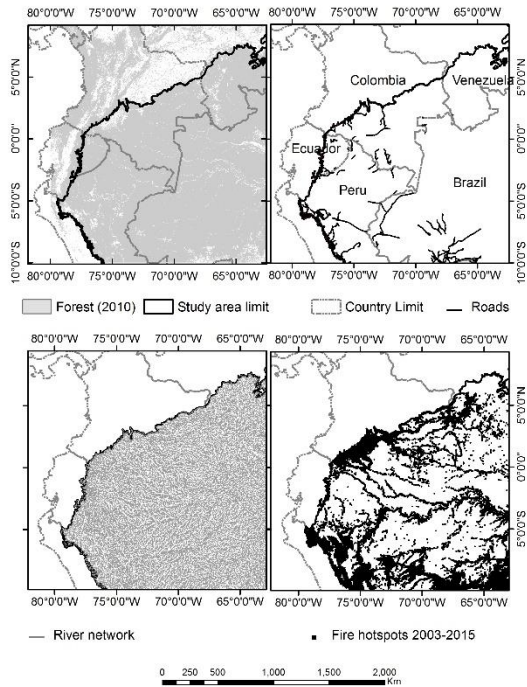

P19 - In Fig 5A, I think it is not needed to draw data corresponding to distance values of  $> 8000\text{m}$ . Looks like the cumulative frequencies in all countries have already approached 1.

We will modify the figures as follows  
Figure 5A

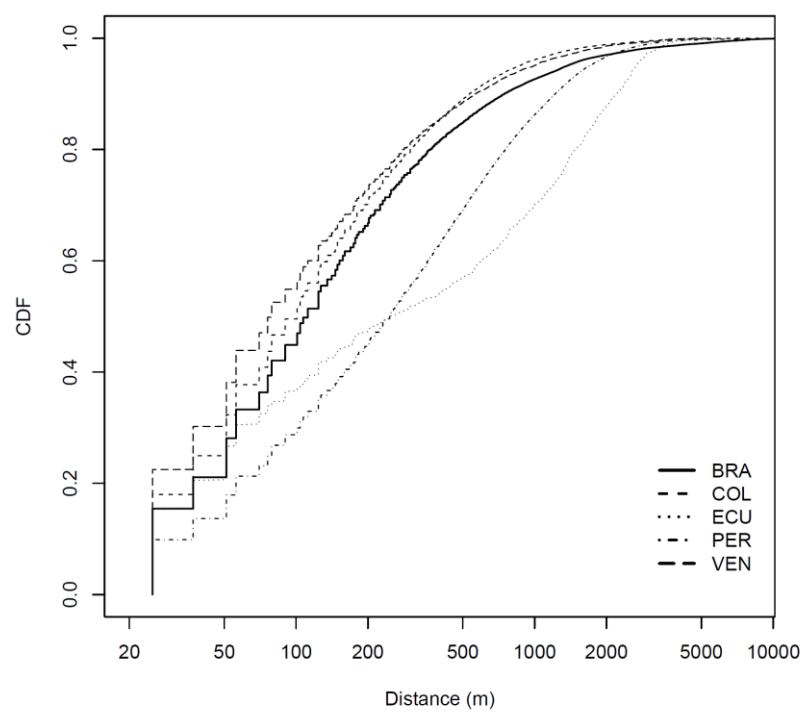

Figure 5B

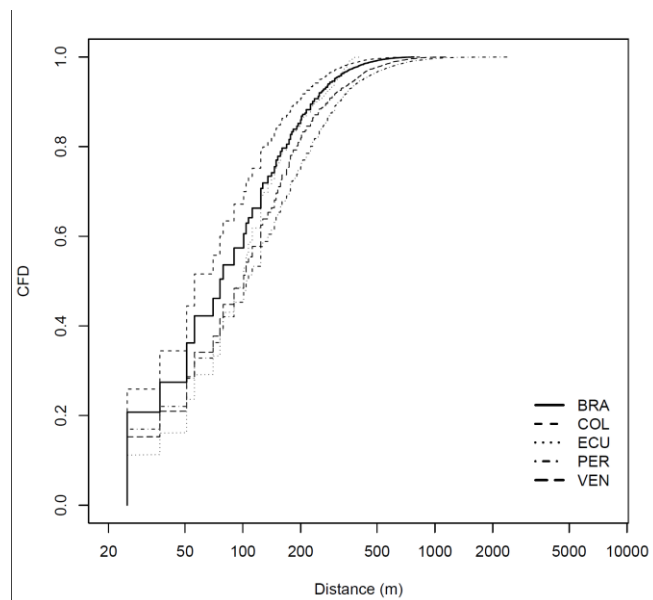

Supplement: Supplementary file [file bg-2016-532-AC3-supplement.pdf]
